# Supplementary material for: Trecode: A FAIR Eco-System for the Analysis and Archiving of Omics Data in a Combined Diagnostic and Research Setting
Source: MDPI journal article supplement (doi:10.3390/biomedinformatics3010001), 2022-12-23
Supplement: s1 [file s1]

|                          | Trecode                                       | OTP                                          | HTS-Flow                                        | QuickNGS                                     | Closha                                                   | Terra                                  |
|--------------------------|-----------------------------------------------|----------------------------------------------|-------------------------------------------------|----------------------------------------------|----------------------------------------------------------|----------------------------------------|
| Data type                | WGS, WXS, RNA-Seq, Methylation Array          | WGS, WXS, WGBS, RNA-Seq, ChIP-Seq            | BS-seq, RNA-Seq, ChIP-Seq, DNaseI-Seq           | WGS, RNA-Seq, ChIP-Seq,miRNA                 | WGS,WXS, RNA-Seq, ChIP-Seq                               | WGS,WXS,RNA-Seq,WGBS                   |
| Meta data                | +++                                           | ++                                           | +                                               | ++                                           |                                                          | +                                      |
| GUI                      | +++                                           | ++                                           | +                                               | +                                            | ++                                                       | ++                                     |
| Data provenance          | +++                                           | ++                                           | +                                               | +                                            |                                                          | +                                      |
| Reproducibility          | +++                                           | ++                                           | +                                               | +                                            | ++                                                       | ++                                     |
| EGA/SRA compatibility    | +++                                           | ++                                           | +                                               |                                              |                                                          |                                        |
| Automation               | +++                                           | +++                                          | ++                                              | ++                                           | +                                                        | +                                      |
| Flexibility              | +++                                           | ++                                           | ++                                              | +                                            | ++                                                       | ++                                     |
| Workflow specification   | WDL                                           | Java/Groovy                                  | R                                               | bash/perl                                    | Closha canvas                                            | WDL                                    |
| Workflow execution       | Cromwell                                      | Roddy/PBS/SGE/LSF                            | R BatchJob/SGE                                  | Slurm, Torque                                | Hadoop                                                   | Cromwell                               |
| Execution environment    | HPC Cluster, Cloud                            | HPC cluster                                  | HPC cluster                                     | HPC cluster                                  | HPC cluster                                              | Cloud                                  |
| Major genomics softwares | GATK4, BWA, Samtools, STAR, MultiQC           | BWA, Picard, Samtools, Platypus, ACSeq, STAR | BWA, TopHat, Bismark, MACS, Cufflinks, Cuffdiff | BWA, MACS, Samtools, Cufflinks               | GATK, BWA, Samtools, STAR, TopHat, Cufflinks, Cuffdiff   | GATK4, BWA, Samtools,STAR              |
| Access control           | *                                             | +                                            |                                                 | +                                            |                                                          |                                        |
| Availability             | open source                                   | open source                                  | open source                                     | open source                                  | service                                                  | service/open source**                  |
| Re-use                   | +++                                           | +                                            |                                                 |                                              | +                                                        | +                                      |
| unified QC               | yes (MultiQC)                                 | no (custom)                                  | no (custom)                                     | no (custom)                                  | no                                                       | no                                     |
| Result visualization     | +***                                          | ++                                           |                                                 | ++                                           | +                                                        |                                        |
| Version control          | yes                                           | yes                                          | yes                                             | yes                                          |                                                          | yes                                    |
| Multiuser                | yes                                           | yes                                          | no                                              | no                                           | yes                                                      | yes                                    |
| Institution              | Princess Máxima Center for Pediatric Oncology | German Cancer Research Center (DKFZ)         | Fondazione Istituto Italiano di Tecnologia      | CECAD Research Center, University of Cologne | Korea Research Institute of Bioscience and Biotechnology | Broad Institute / Verily Life Sciences |
| Latest development       | 2020                                          | 2020                                         | 2016                                            | 2016                                         | 2020                                                     | 2020                                   |

\*=waiting for implementation in Molgenis

\*\*=no documentation yet for spinning up a Terra instance

\*\*\*=trecode includes exports to visualization platforms cBioportal and R2
