# Supplementary material for: Trecode: A FAIR Eco-System for the Analysis and Archiving of Omics Data in a Combined Diagnostic and Research Setting
Source: MDPI journal article supplement (doi:10.3390/biomedinformatics3010001), 2022-12-23
Supplement: s1 [file s1]

| Identifier (two letter code) | Metadata type             |
|------------------------------|---------------------------|
| ID                           | Individual                |
| DN                           | Diagnosis                 |
| BS                           | Biosource                 |
| BM                           | Biomaterial               |
| LB                           | Library                   |
| RX                           | Experiment                |
| RR                           | Run                       |
| RZ                           | Analysis                  |
| AS                           | Assay                     |
| IC                           | Informed consent          |
| PR                           | Project / Study           |
| ES                           | EGA submission            |
| PO                           | EGA policy                |
| DA                           | EGA data access committee |
| DS                           | EGA dataset               |
| TR                           | Treatment                 |
| PH                           | PDX host                  |
| PN                           | PanelOfNormals            |
| BC                           | Barcode                   |
| WI                           | Workflow instance         |
| WE                           | Workflow environment      |
